# Supplementary material for: Intracellular spatial transcriptomic analysis toolkit (InSTAnT)
Source: PubMed Central journal article supplement — Nat Commun. 2024 Sep 6;15:7794. doi: 10.1038/s41467-024-49457-w (PMC11379969; doi:10.1038/s41467-024-49457-w), 2024-09-06
Supplement: 41467_2024_49457_MOESM3_ESM.pdf [file 41467_2024_49457_MOESM3_ESM.pdf]

**Supplementary Data 1:** Results of CPB test on MERFISH U2OS data at  $d=4\mu$ . We detected 304 gene pairs at CPB FPR < 2% (CPB p-value <  $1e-4$ ). Table also contains colocalized cells i.e. cells in which the gene pair was detected proximal pair (PP p-value <  $1e-3$ ). The primary category denotes the category with the highest number of proximal pairs across all cells (Methods).

**Supplementary Data 2:** Results of CPB test for top 304 pairs on MERFISH U2OS data at  $d=1\mu$  (FPR < 20%, CPB p-value < 0.015). Top 304 pairs were chosen to match the size of d-colocalized pairs at  $d=4\mu$ .

**Supplementary Data 3:** Results of overlap of the set of d-colocalized gene pairs with co-expressed gene pairs. Co-expressed gene pairs are identified based on Pearson correlation of whole-cell transcript counts, and the top 304 pairs are taken to match the size of the d-colocalization map.

**Supplementary Data 4:** Results of overlap of the set of d-colocalized gene pairs with gene pairs having RRI score > 35.

**Supplementary Data 5:** Results of top 108 gene pairs from CPB test (FPR = 0%, CPB p-value <  $1e-10$ ) on Seqfish NIH/3T3 cell line at  $d=2\mu$ .

**Supplementary Data 6:** Results of differential colocalization (both category 1 and category 2) on MERFISH mouse brain hypothalamus data.  $p_{uncond}$  denotes the p-value of hypergeometric test on the set of colocalized pairs and set of cells of one type. One vs all test was performed on each cell type independently. A threshold of  $5e-6$  was used for  $p_{uncond}$  (Bonferroni corrected p-value = 0.05).  $p_{cond\_g1}$  and  $p_{cond\_g2}$  denotes the conditional p-value denoting if the cell type specificity arises simply because one of the genes in the pair is expressed specifically in that cell type (Methods). Furthermore, a hypergeometric test is performed on the set of colocalized cells and cells with higher gene expression. p-value obtained from such test was used in ranking to obtain gene markers (top 10 genes).  $min\_rank1$  denotes the minimum rank of either of the gene.

**Supplementary Data 7:** Results of differential colocalization of category 2 gene pairs on MERFISH mouse brain hypothalamus data.

**Supplementary Data 8:** Results of differential colocalization of category 2 gene pairs on aggression vs naïve mouse hypothalamus data (Methods).

**Supplementary Data 9:** Results of differential colocalization of category 2 gene pairs on three regions of mouse brain Xenium data (Methods).

**Supplementary Data 10:** Results of spatial modulation on mouse brain data (LLR>17). *i\_s\_ct\_specific* is 1 if there is significant overlap between the set of colocalized cells and cells of any type.
